# Supplementary material
Source: publisher figshare collection journal article supplement (https://gsapubs.figshare.com/ndownloader/files/38161116)
Supplement: Supplementary file 1 [file 38161116]

## Sheet: Sheet1
5. TABLE OF WHOLE-ROCK CHEMISTRY OF DATED SAMPLES
Age	MIOCENE	L A T E C R E T A C E O U S							MIDDLE CRET.	L A T E J U R A S S I C			MIDDLE JURASSIC
Sample ID	MH	CH	CX	HM	IM	KI	SH	TMd	PO	LH	MMd	MMg	TMg	CO
Field no.	H80MH-311	BJ80CH-307	H80CX-386	H81HM-69	H80IM-357	H79KI-263	H80SH-191	H83TM-62	H84PO-102	H80LH216	H80MM-233	H80MM-237	H79TM-486A	H80CO-424
Major oxides, weight%, normalized to 100%*
Si02	54.4737	69.8918	67.589	73.4058	74.8906	65.3317	68.4258	60.516	69.9624	66.5588	56.7801	76.2382	69.9255	70.3396
TiO2	0.983909	0.404408	0.541353	0.191108	0.0894988	0.606796	0.432248	0.815273	0.26447	0.67752	0.893855	0.120313	0.332259	0.310528
Al203	13.9285	15.8831	16.7018	14.997	13.9021	16.879	16.7069	17.1104	16.0208	15.7347	18.4865	12.8935	14.8308	15.4863
Fe203	1.80383	1.02113	1.31328	0.834842	0.517104	1.7496	1.14596	2.97214	1.22063	2.15391	3.16912	0.731903	1.77205	1.2922
FeO	5.26801	1.21322	1.26316	0.583384	0.417661	2.00243	1.33695	3.29205	1.32235	1.76964	4.0325	0.110287	1.16794	1.26215
MnO	0.174234	0.0303306	0.0401003	0.030175	0.0298329	0.0404531	0.0301568	0.103199	0.0610314	0.0707857	0.132047	0.0300782	0.0906162	0.0500851
MgO	8.56821	0.808816	1.06266	0.42245	0.228719	1.55744	0.824286	3.19917	0.69169	1.53706	2.90503	0.160417	0.936367	0.761294
CaO	10.0851	3.00273	3.53885	1.59928	1.31265	4.19701	3.24688	5.73787	3.7636	3.20558	6.77501	0.761981	2.51712	2.68456
Na2O	3.11571	4.50915	4.7218	3.77188	3.63962	4.38916	4.58384	3.26109	3.53982	3.62018	3.88014	3.44897	3.51389	3.63618
K2O	1.35287	3.09372	3.05764	4.09374	4.95227	3.04409	3.1162	2.76574	3.03123	4.43928	2.64093	5.48426	4.75232	3.99679
P2O5	0.245977	0.141543	0.170426	0.0704084	0.0198886	0.202265	0.150784	0.227038	0.122063	0.232582	0.304723	0.0200521	0.161095	0.180307
(Oxide total)**	97.57	98.91	99.75	99.42	100.56	98.88	99.48	96.9	98.31	98.89	98.45	99.74	99.32	99.83
H20+	1.66	1.1	0.21	0.51	0.04	0.58	0.33	1.5	0.63	0.81	0.97	0.07	0.73	0.36
H2O-	0	0	0	0	0	0	0	0.1	0.04	0	0	0	0	0
CO2	0.26	0.2	0.15	0.17	0.05	0.18	0.09	0.24	0.14	0.4	0.28	0.06	0.22	0.03
Trace elements, ppm***
Ba	898	1019	1304	1021	797	1036	1191	840	1122	953	1583	476	1260	1215
Cr	520	5	3	5	3	9	3	27	3	9	16	7	3.65	5
Cu	34	7	9	4	2	10	5	75	4	16	63	2	8	6
Ga	0	0	27	18	27	24	24	20	20	18	0	0	18	0
Nb	9	9	9	11	12	0	14	10	11	0	11	14	8	14
Ni	121	2	3	2	2	9	5	25	4	6	15	1	4	3
Pb	6	23	23	30	25	16	15	15	8	18	9	14	11	30
Rb	31	87	67	115	152	99	80	77	56	194	84	177	142	120
Sr	583	692	864	432	246	764	797	585	716	293	724	90	371	515
Th	3	4	7	8	9	7	4	6	4	26	2	21	8	12
U	0	1	1	2	3	3	1	3	2	5	4	3	2	1
V	164	40	47	4	13	64	32	137	22	57	151	2	36	19
Y	20	11	10	13	24	19	12	21	18	49	22	26	20	14
Zn	86	60	106	47	33	73	61	104	39	41	92	7	27	62
Zr	125	181	176	131	108	206	140	188	135	424	224	117	119	155
*Oxides determined by X-ray fluorescence at Macquarie University; FeO by titration.
** Total oxides as analyzed, before normalization.
***Trace elements (ppm) determined by X-ray fluorescence at Macquarie University.
